# Supplementary material for: Design of 4-Substituted Sulfonamidobenzoic Acid Derivatives Targeting Coxsackievirus B3
Source: MDPI journal article supplement (doi:10.3390/life12111832), 2022-11-09

$^1\text{H}$  and  $^{13}\text{C}$  NMR spectra of 4-(4-(1,3-dioxoisindolin-2-yl)phenylsulfonamido)benzoic acid **2a**

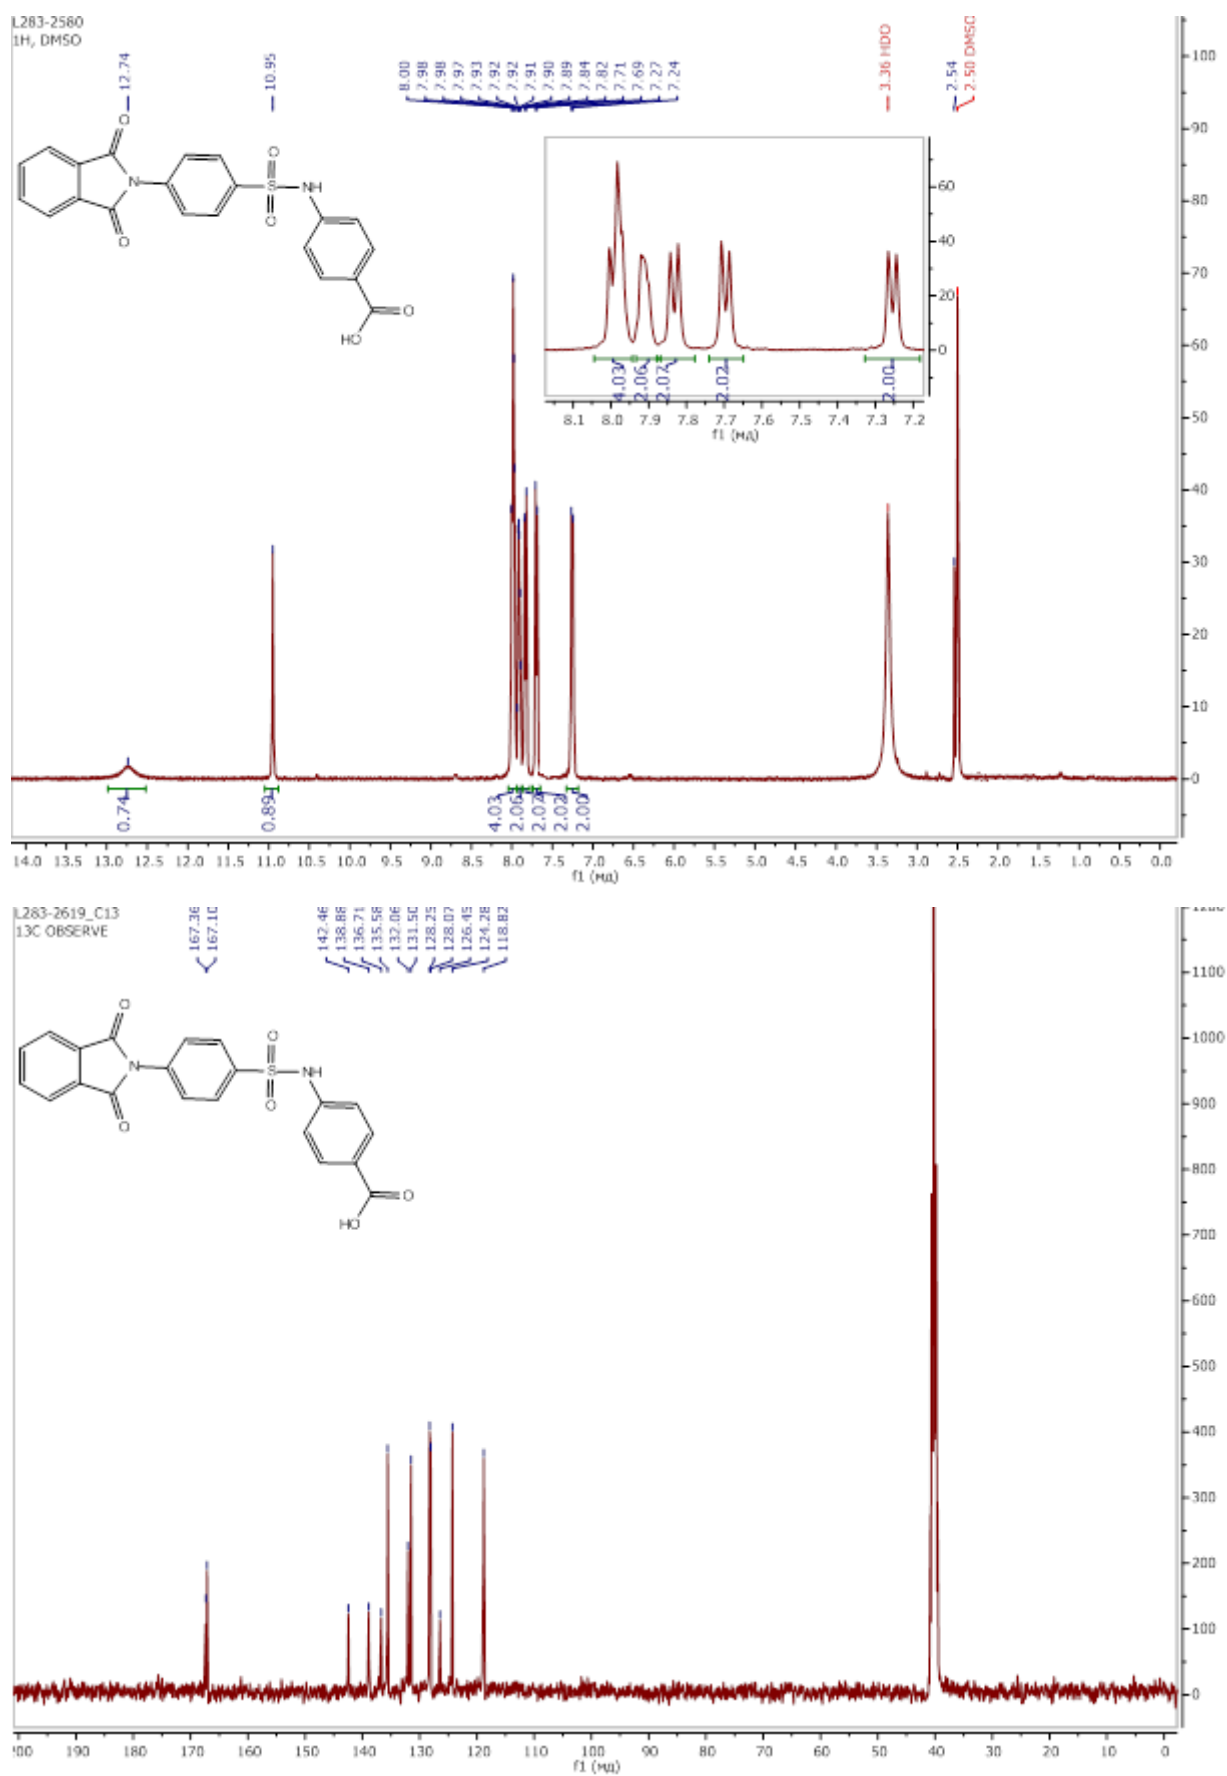

$^1\text{H}$  and  $^{13}\text{C}$  NMR spectra of ethyl 4-(4-(1,3-dioxoisindolin-2-yl)phenylsulfonamido)benzoate **2b**

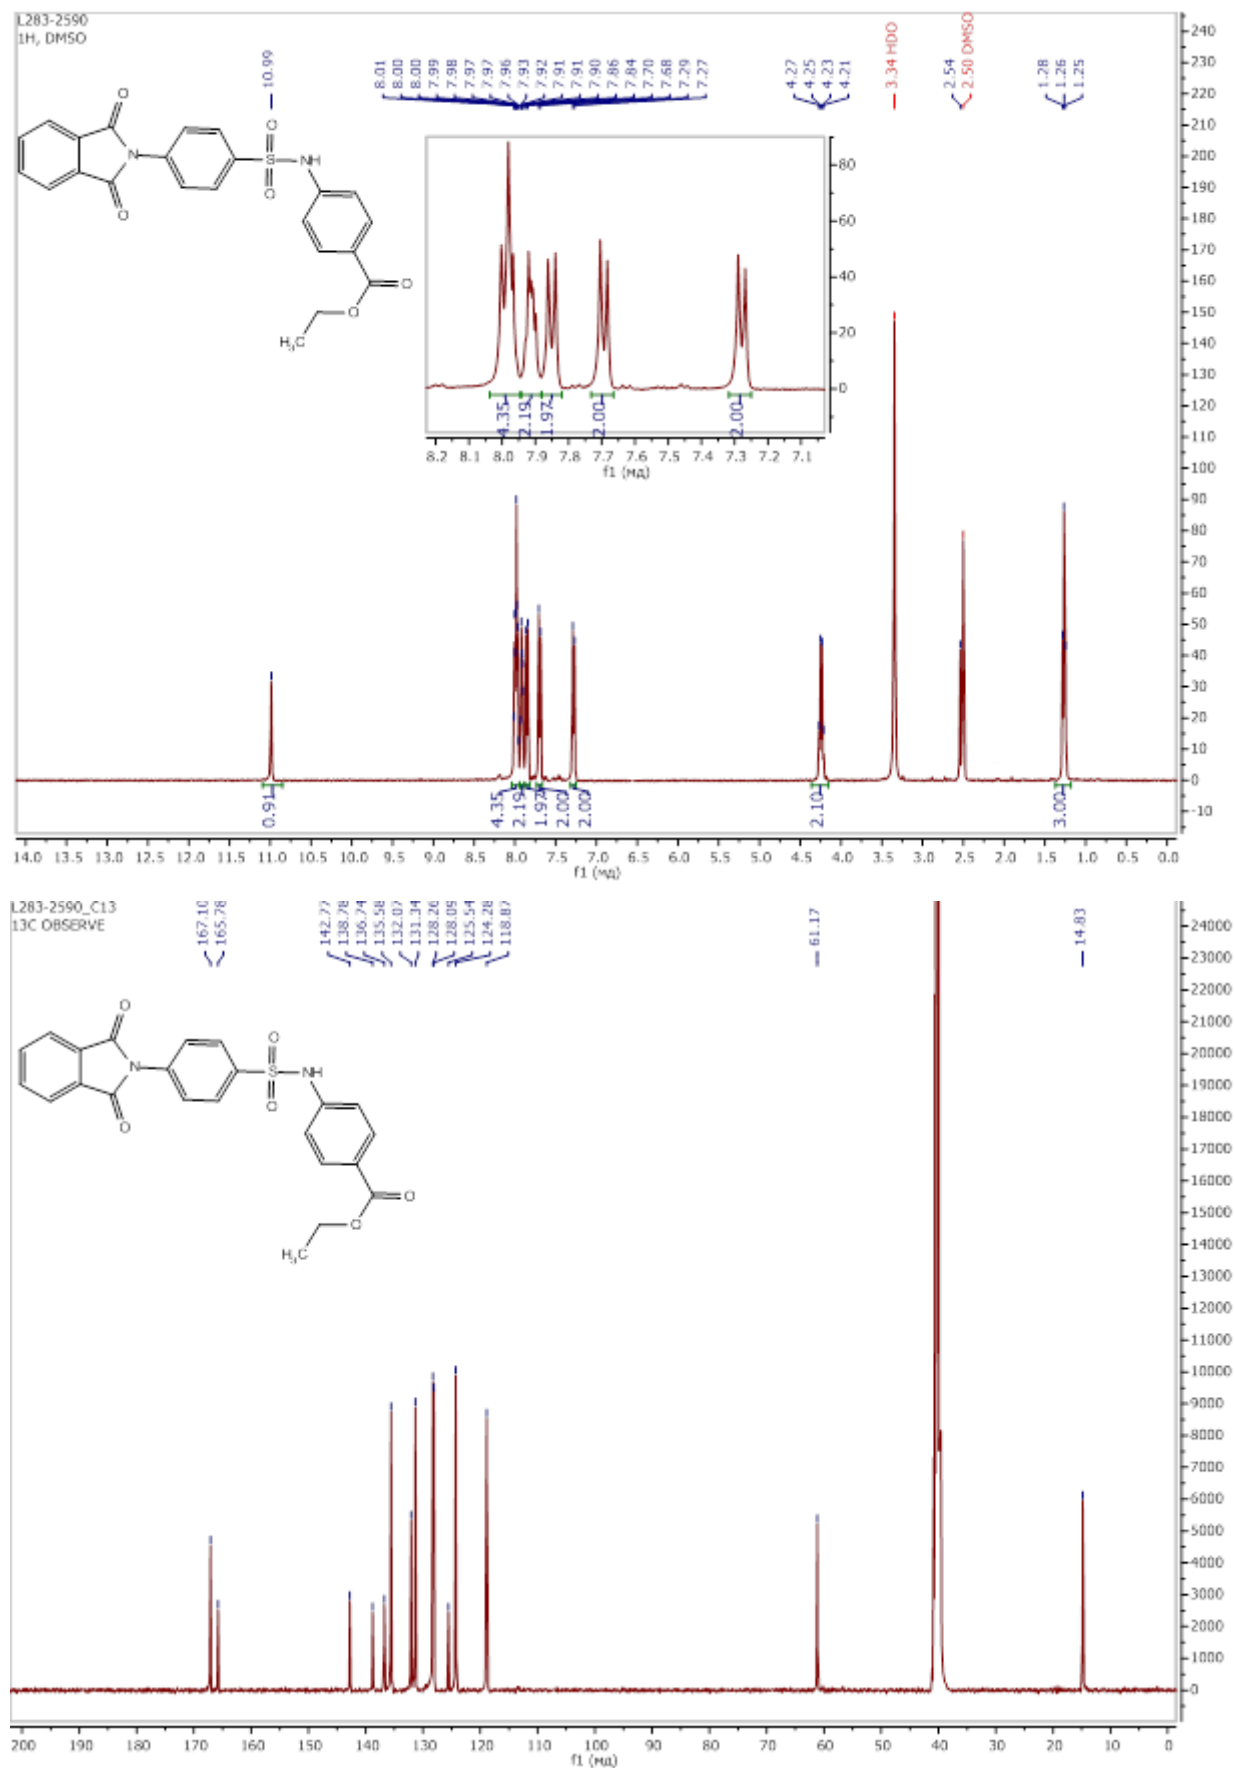

$^1\text{H}$  and  $^{13}\text{C}$  NMR spectra of 4-(4-(1,3-dioxoisindolin-2-yl)phenylsulfonamido)benzamide **2c**

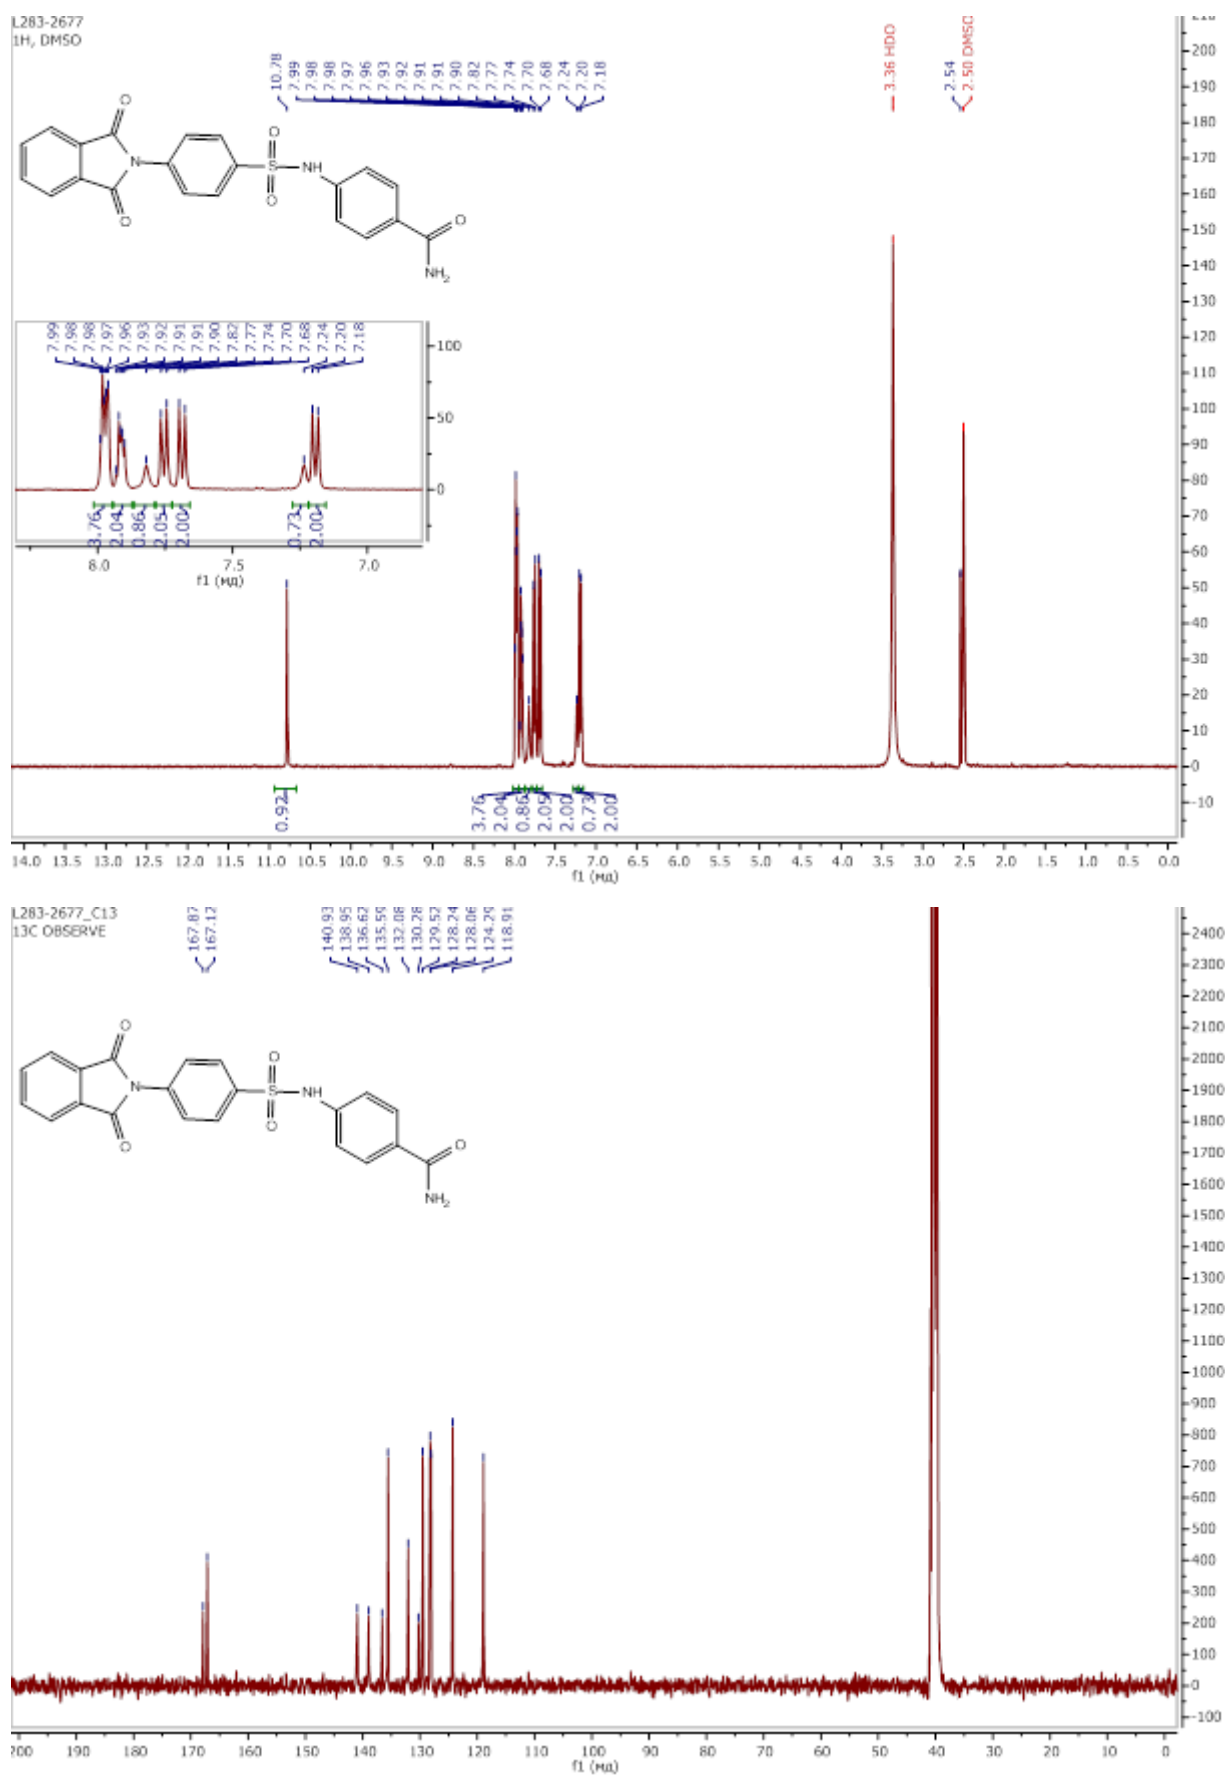

$^1\text{H}$  and  $^{13}\text{C}$  NMR spectra of *N*-(4-cyanophenyl)-4-(1,3-dioxoisindolin-2-yl)benzenesulfonamide **2d**

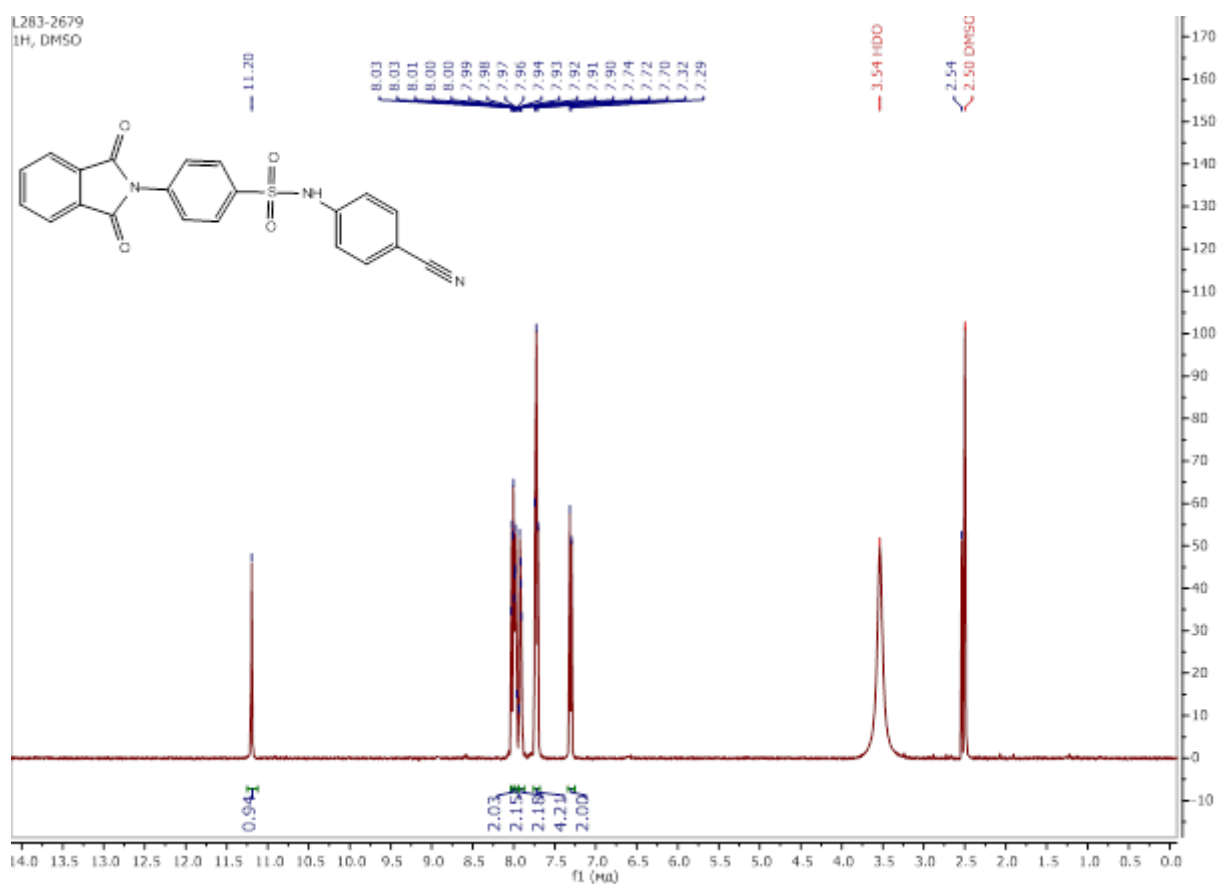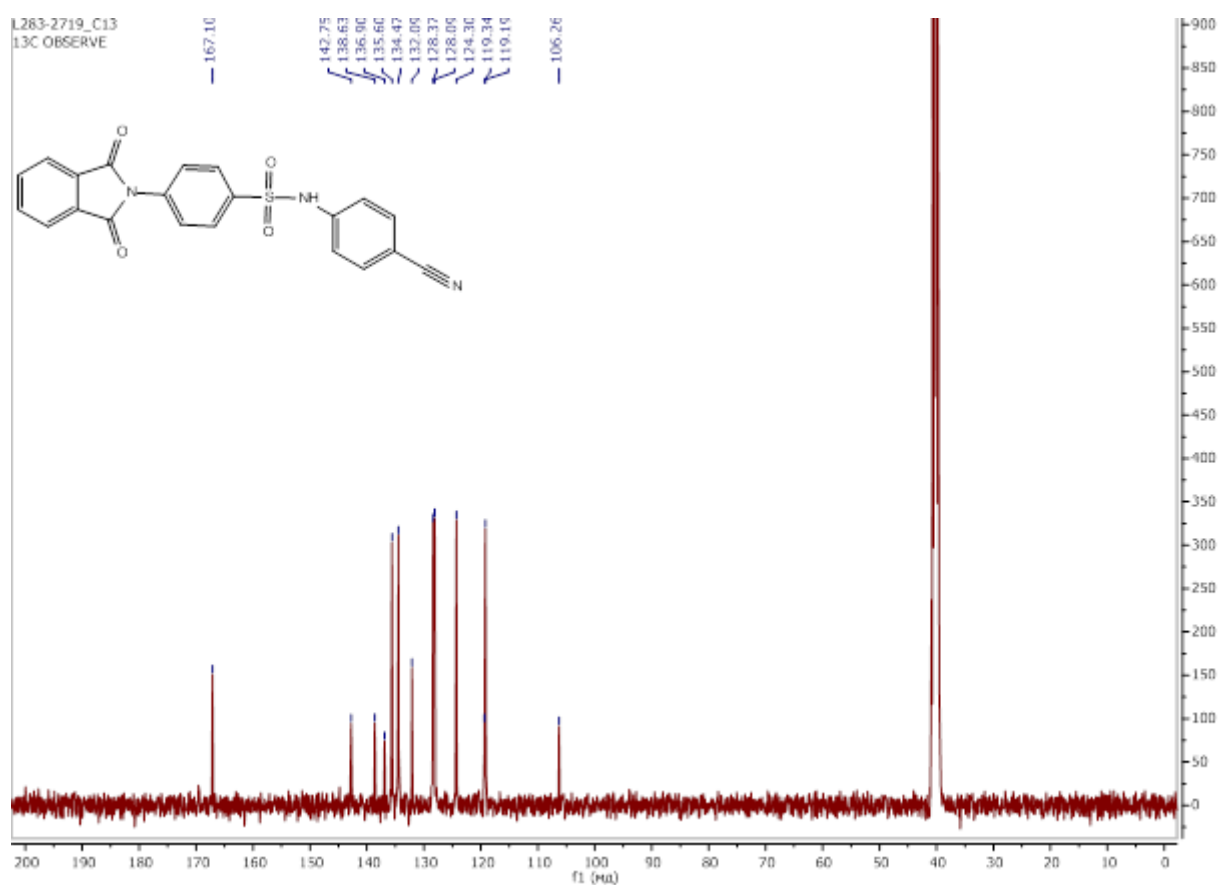

$^1\text{H}$  and  $^{13}\text{C}$  NMR spectra of 4-(1,3-dioxoisindolin-2-yl)-N-(4-sulfamoylphenyl)benzenesulfonamide **2e**

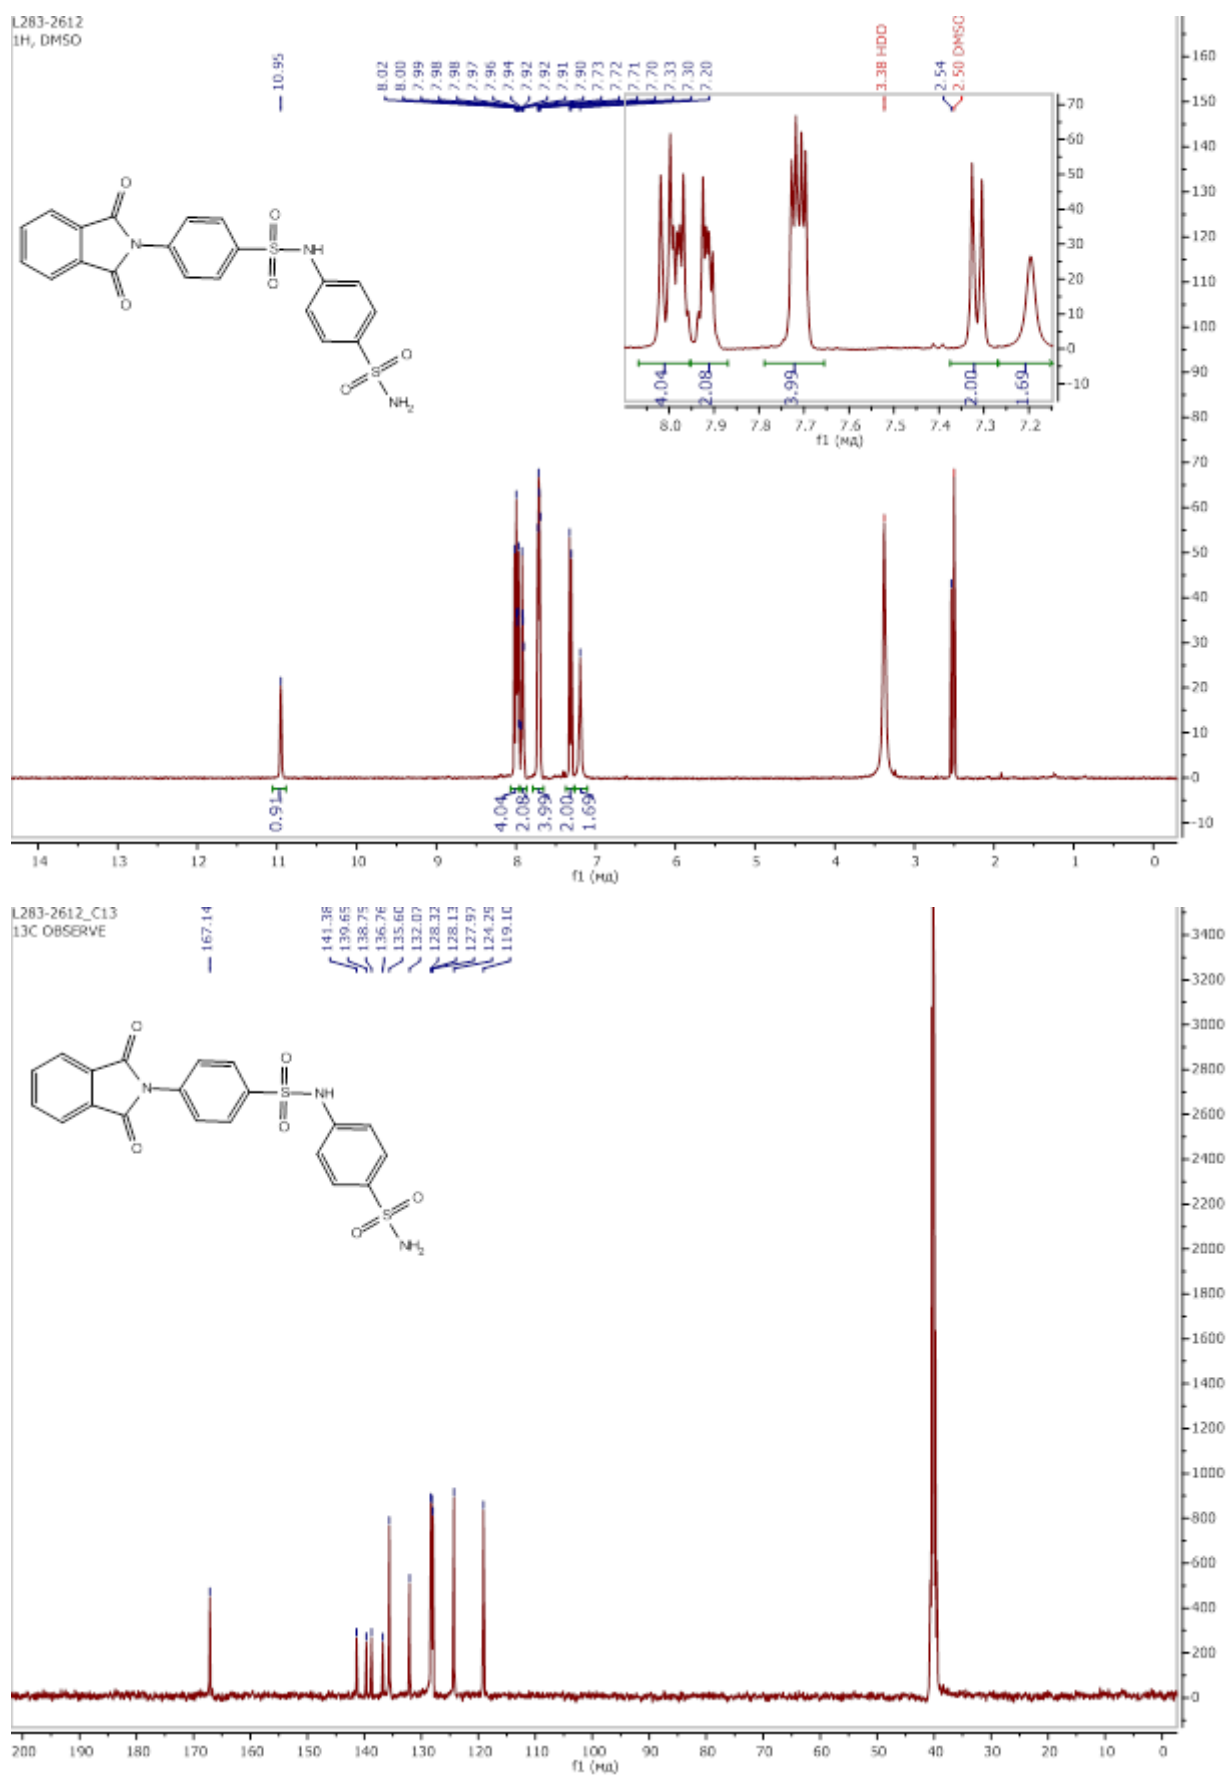

$^1\text{H}$  and  $^{13}\text{C}$  NMR spectra of *N*-(4-(4-(1,3-dioxisoindolin-2-yl)phenyl)sulfonamido)phenyl)acetamide **2f**

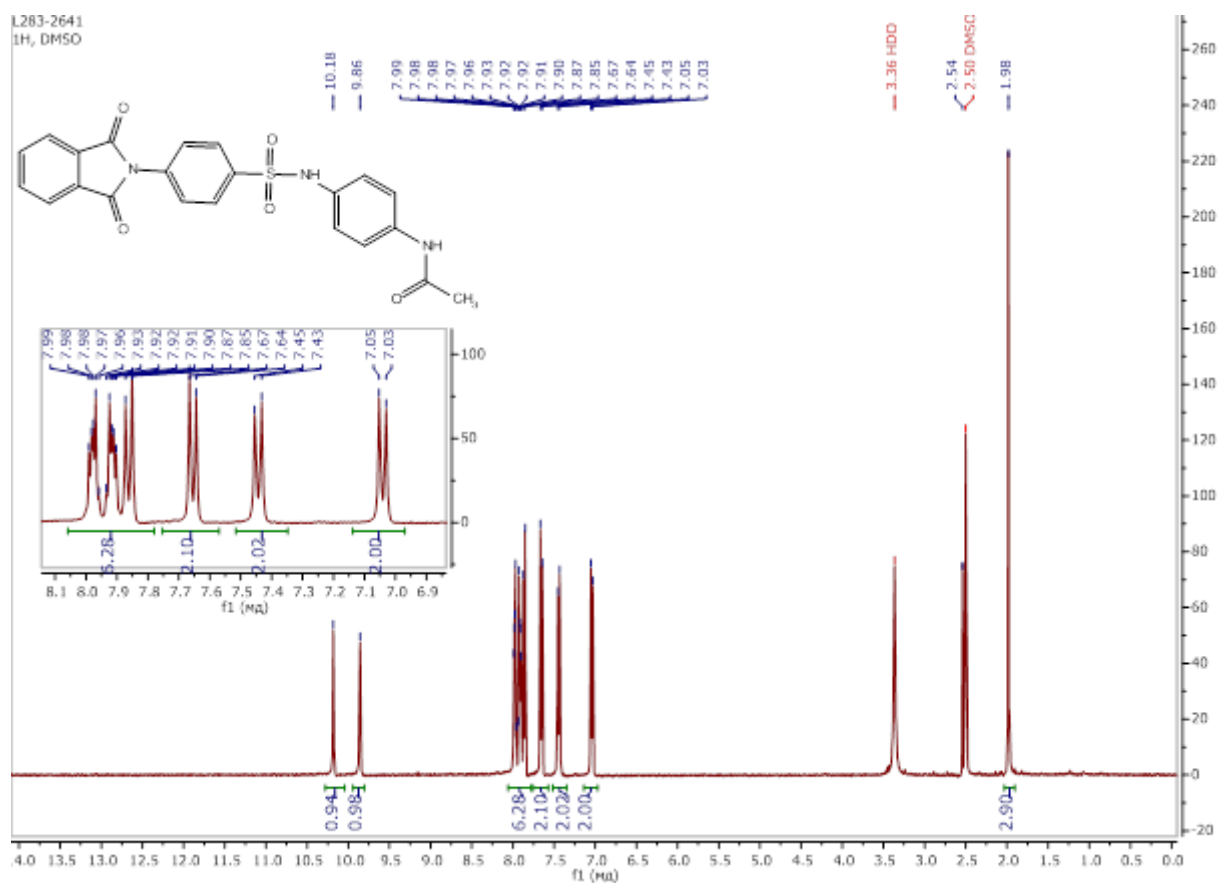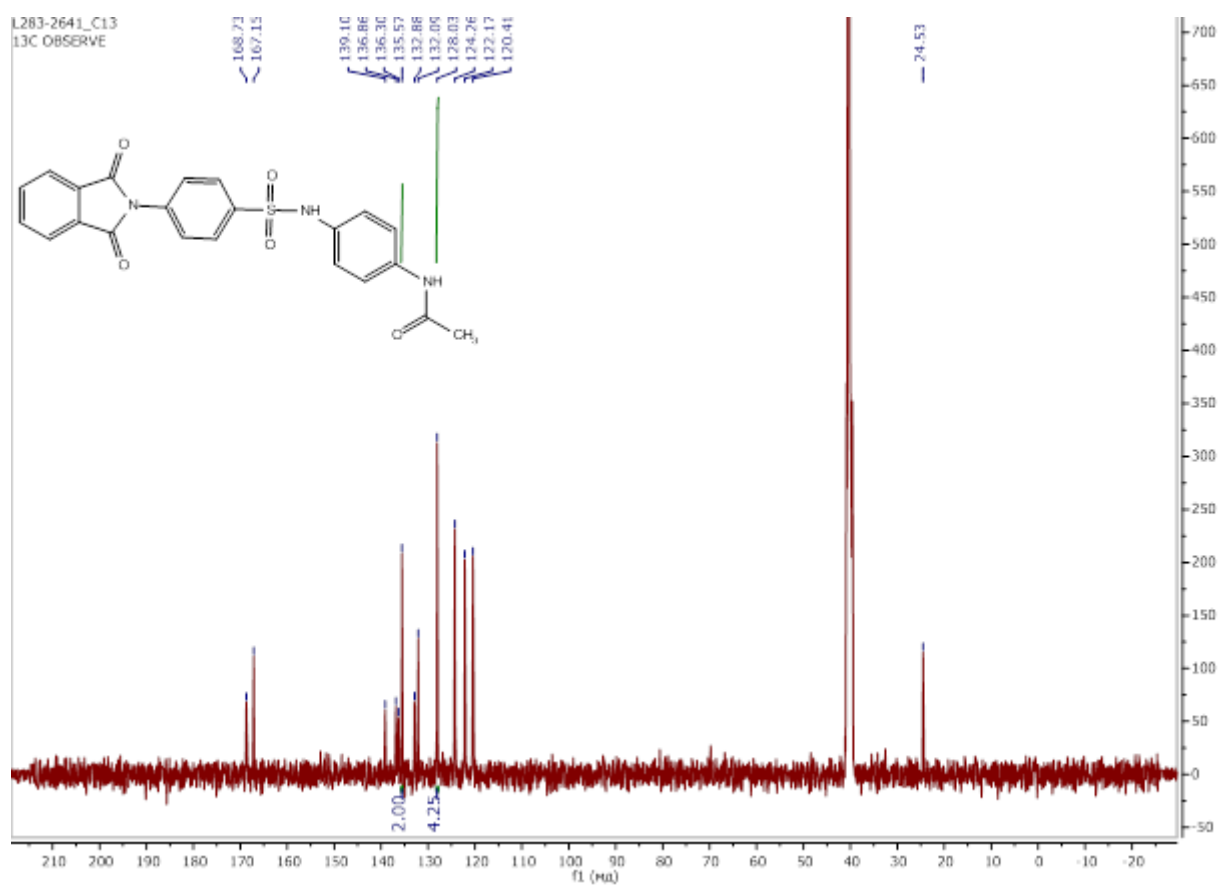

$^1\text{H}$  and  $^{13}\text{C}$  NMR spectra of 1-((4-(1,3-dioxisoindolin-2-yl)phenyl)sulfonyl)piperidine-4-carboxylic acid

**2g**

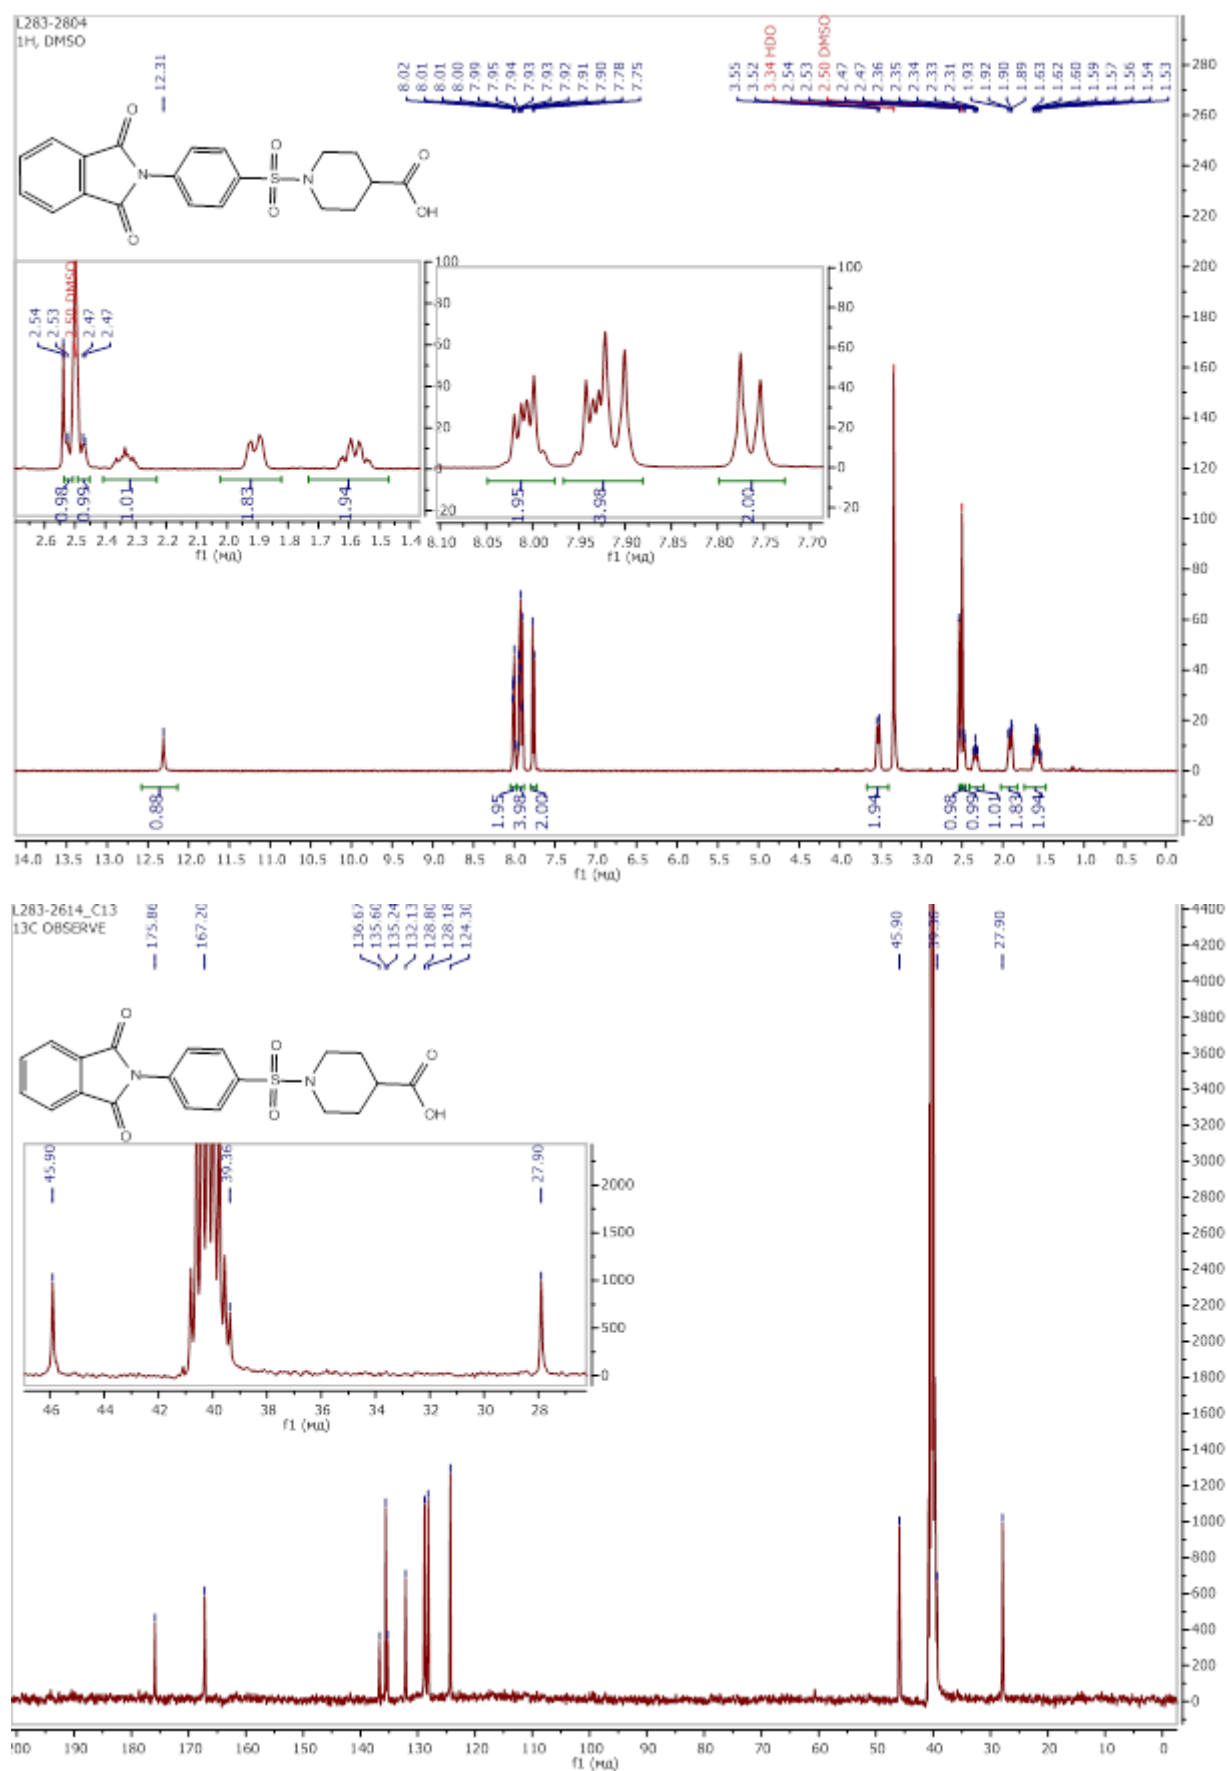





<sup>1</sup>H and <sup>13</sup>C NMR spectra of 1-((4-(1,3-dioxisoindolin-2-yl)phenyl)sulfonyl)piperidine-4-carboxamide **2j**

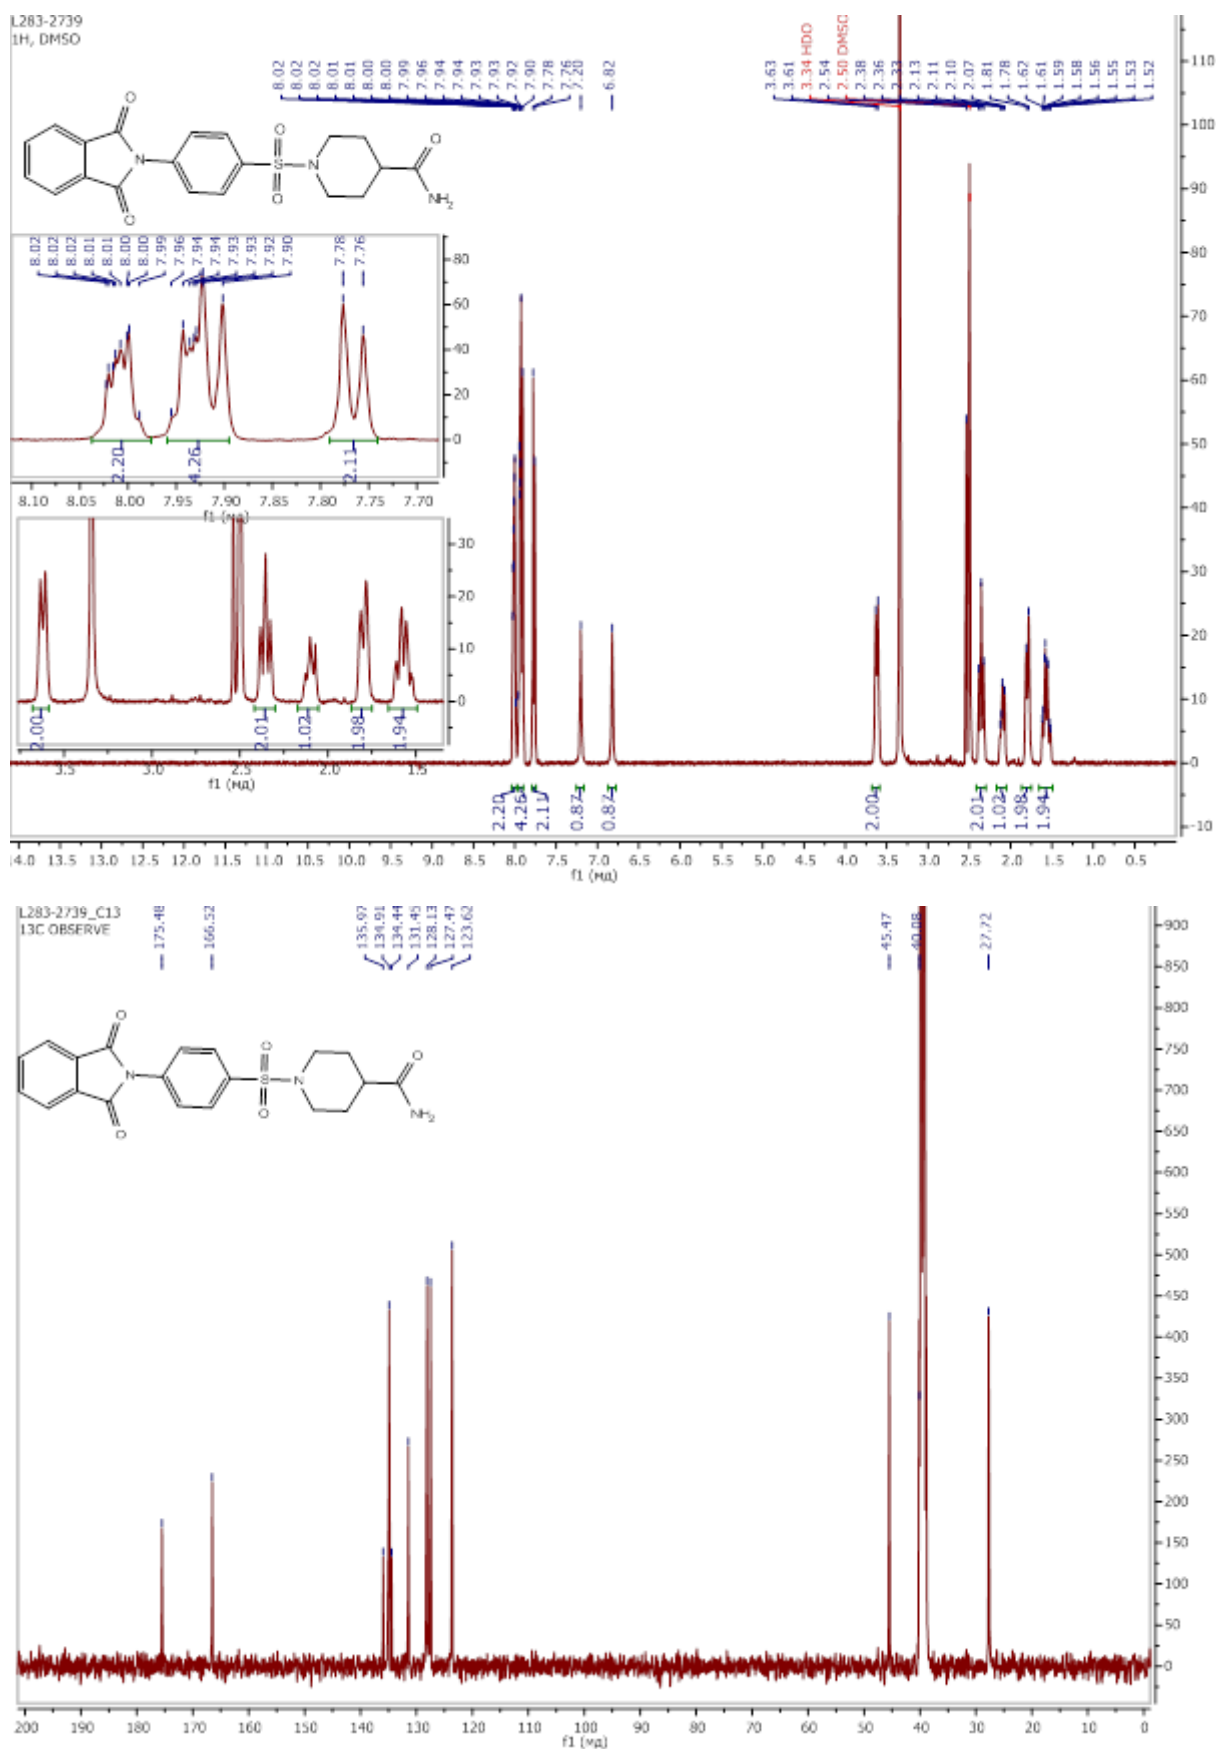

<sup>1</sup>H and <sup>13</sup>C NMR spectra of 4-(4-(1,3-dioxoisindolin-2-yl)phenylsulfonamido)butanoic acid **2i**

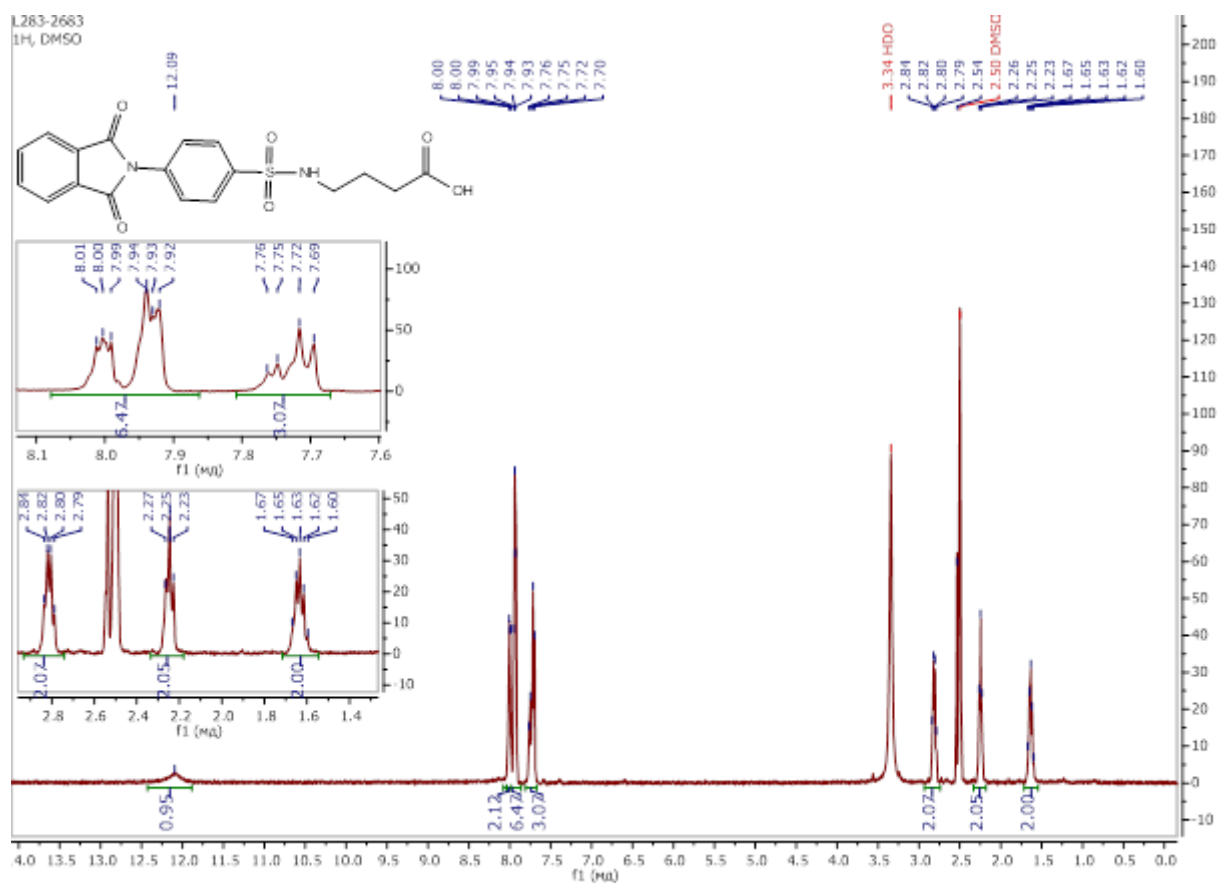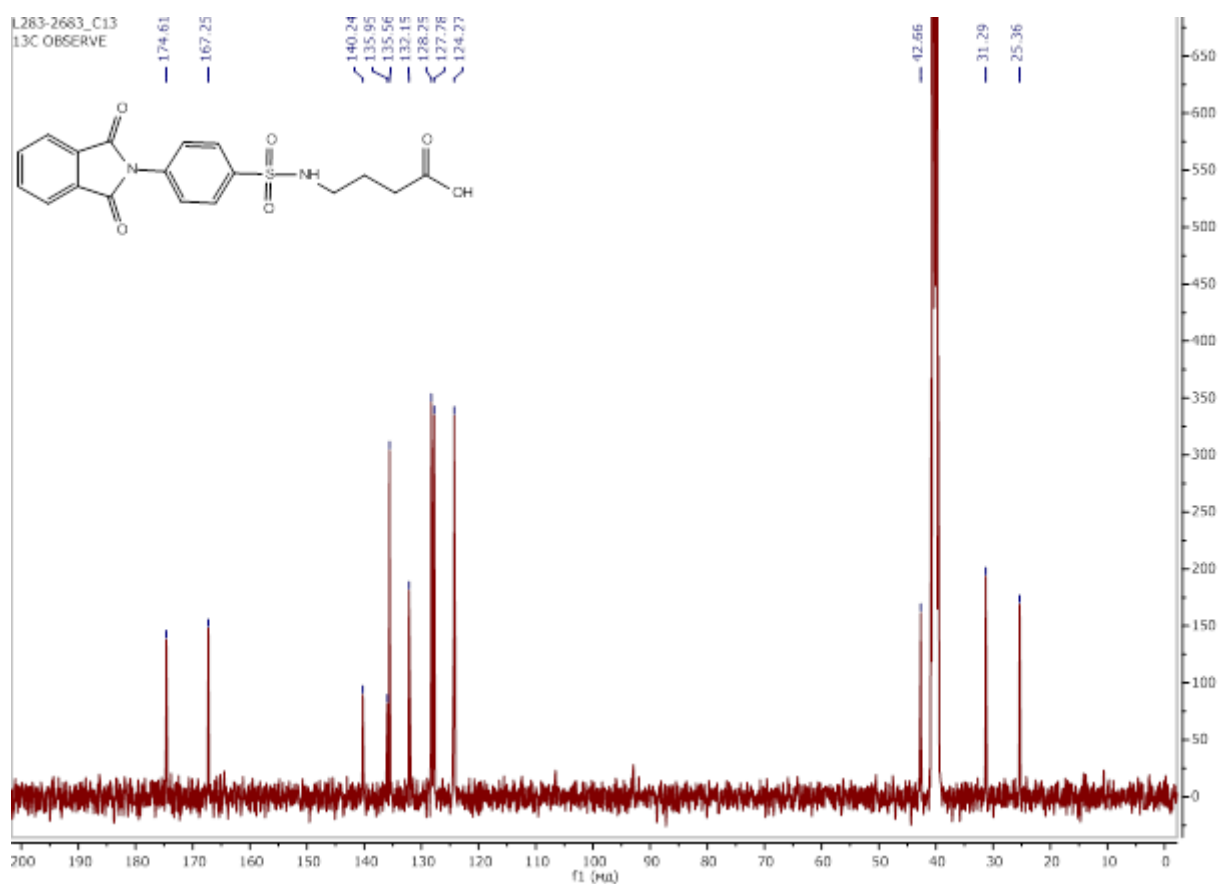

$^1\text{H}$  and  $^{13}\text{C}$  NMR spectra of 2-((4-(*N*-(4-(ethoxycarbonyl)phenyl)sulfamoyl)phenyl)carbamoyl)benzoic acid **3**

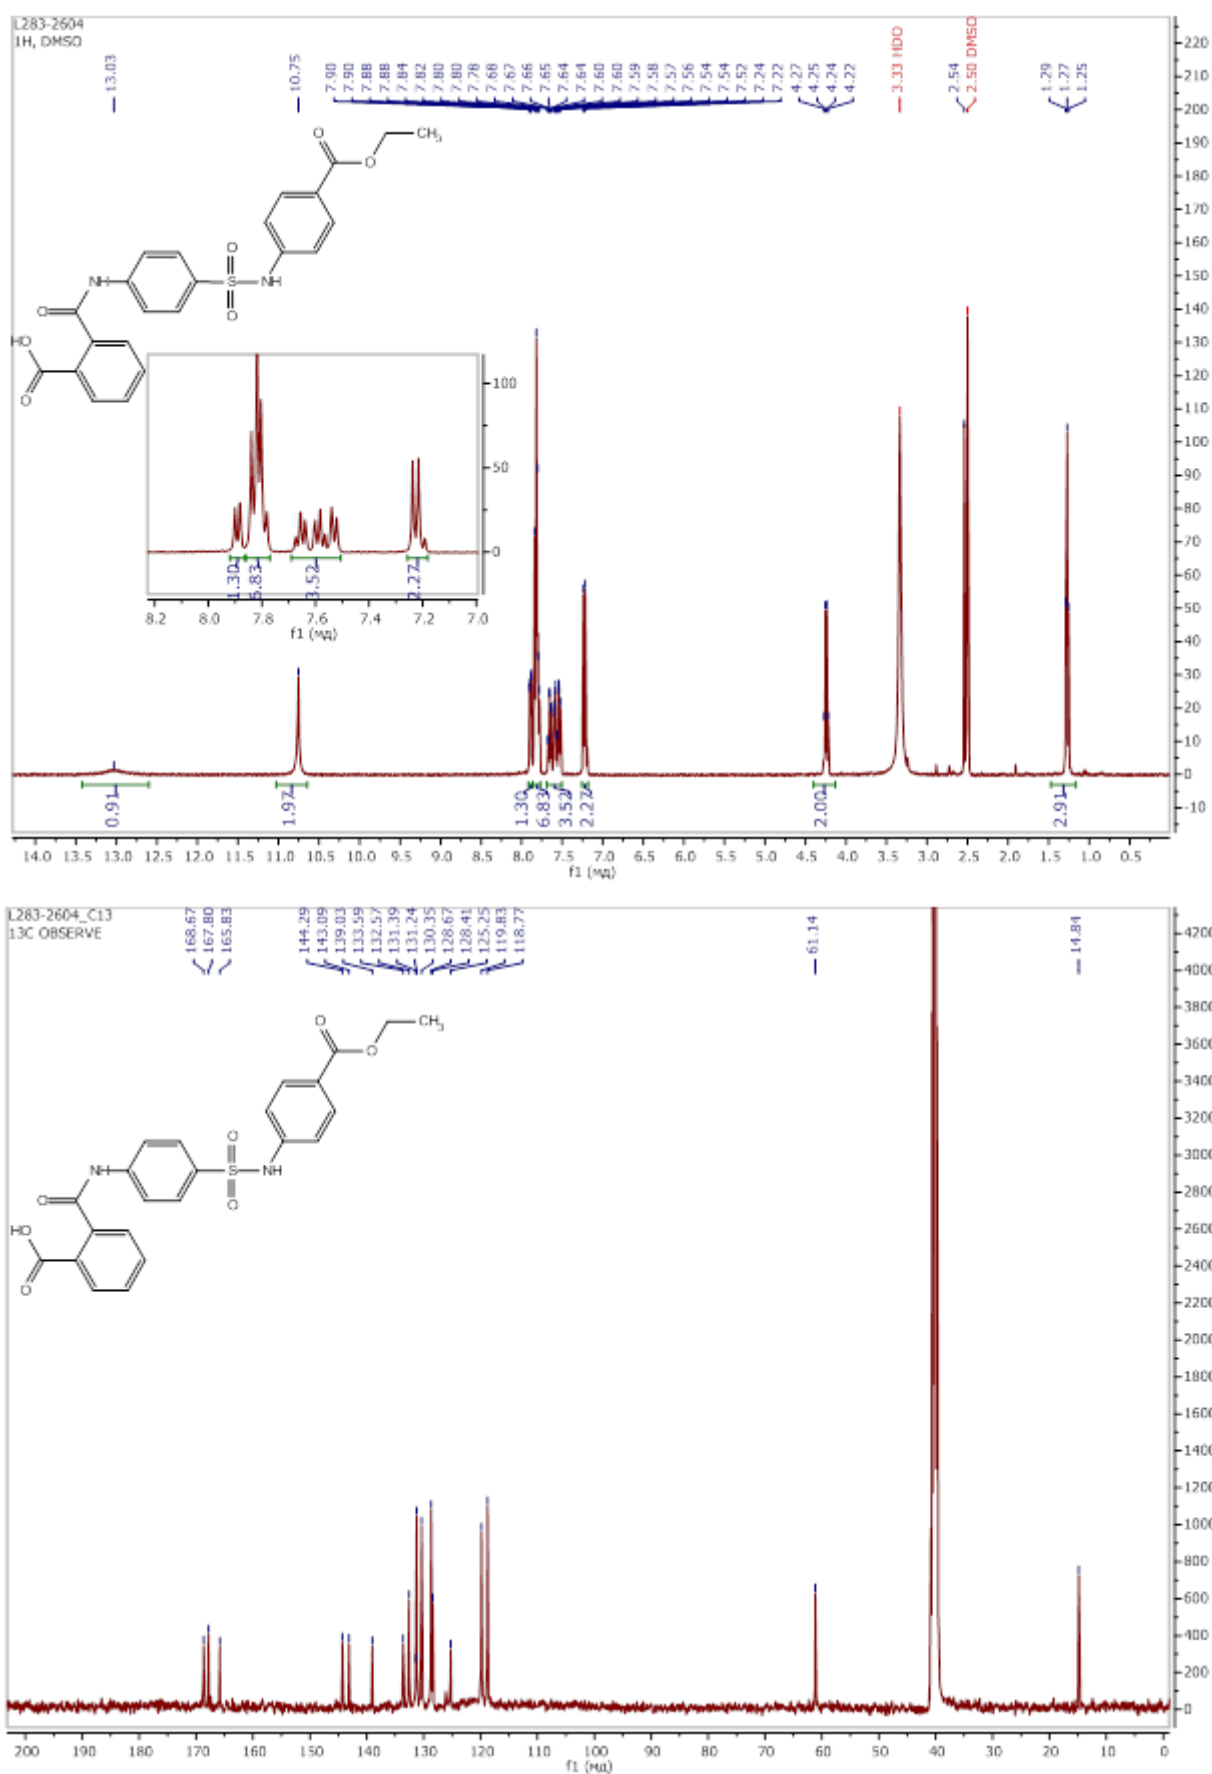





$^1\text{H}$  and  $^{13}\text{C}$  NMR spectra of 4-(4-(2,5-dioxypyrrolidin-1-yl)phenylsulfonamido)benzoic acid **7a**

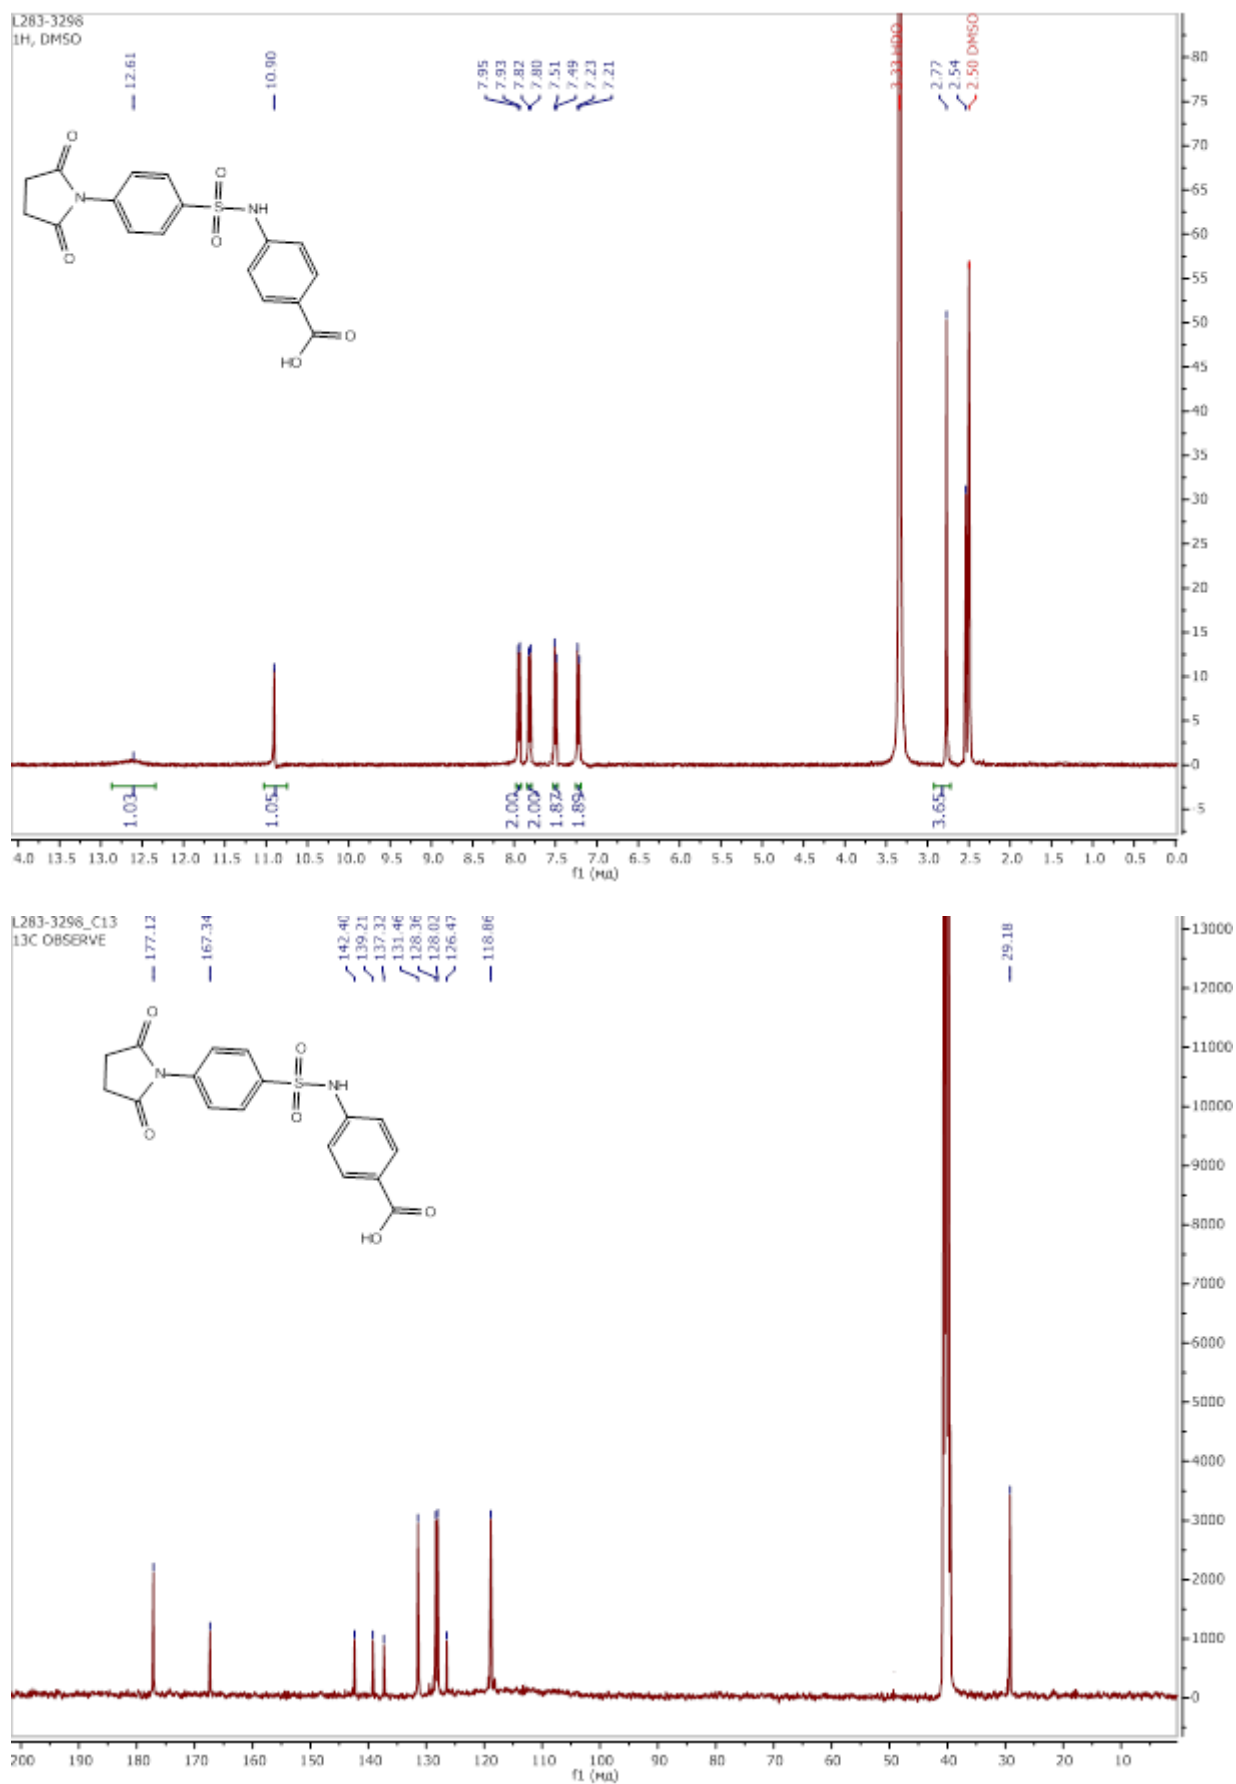

$^1\text{H}$  and  $^{13}\text{C}$  NMR spectra of 4-(4-(1,3-dioxohexahydro-1*H*-4,7-methanoisindol-2(3*H*)-yl)phenylsulfonamido)benzoic acid **7b**

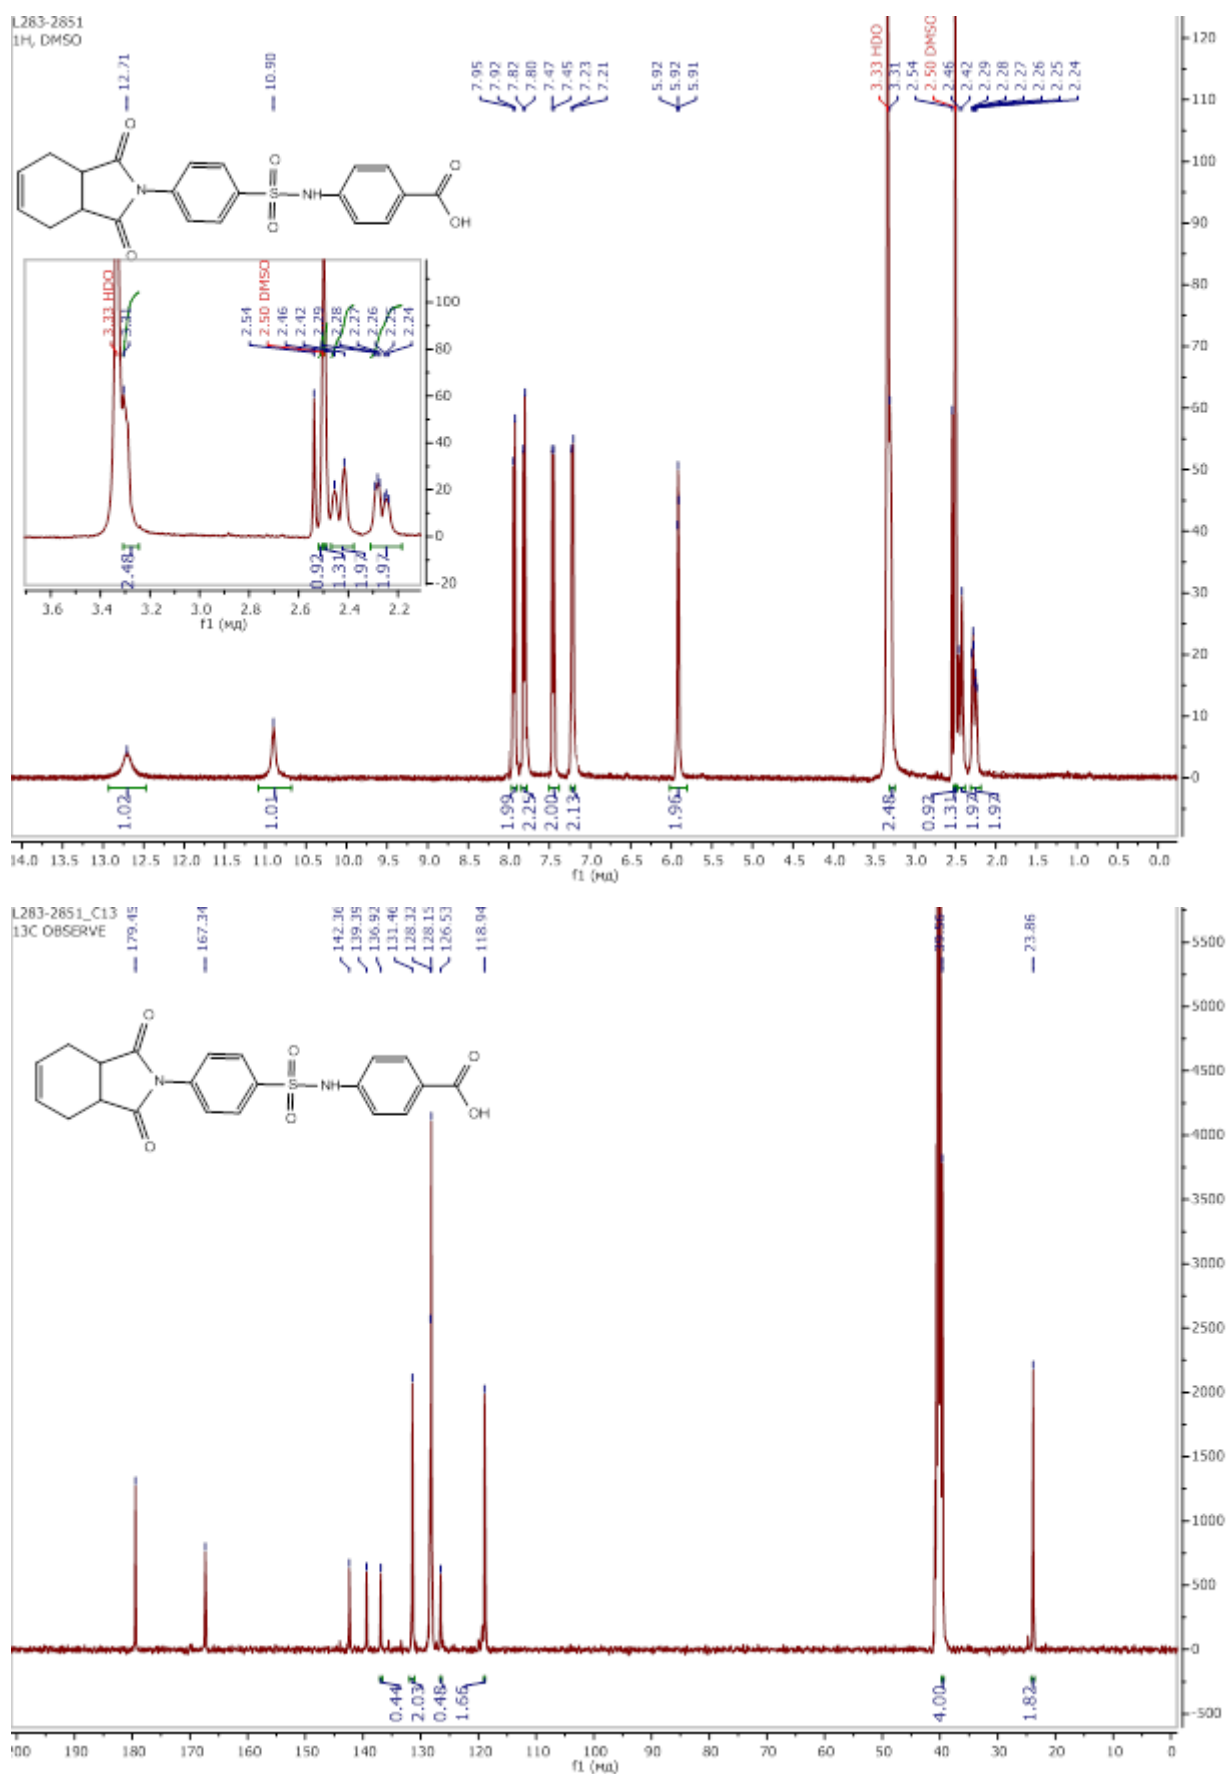

$^1\text{H}$  and  $^{13}\text{C}$  NMR spectra of 4-(4-(1,3-dioxo-3a,4,7,7a-tetrahydro-1*H*-4,7-methanoisindol-2(3*H*)-yl)phenylsulfonamido)-benzoic acid **7c**

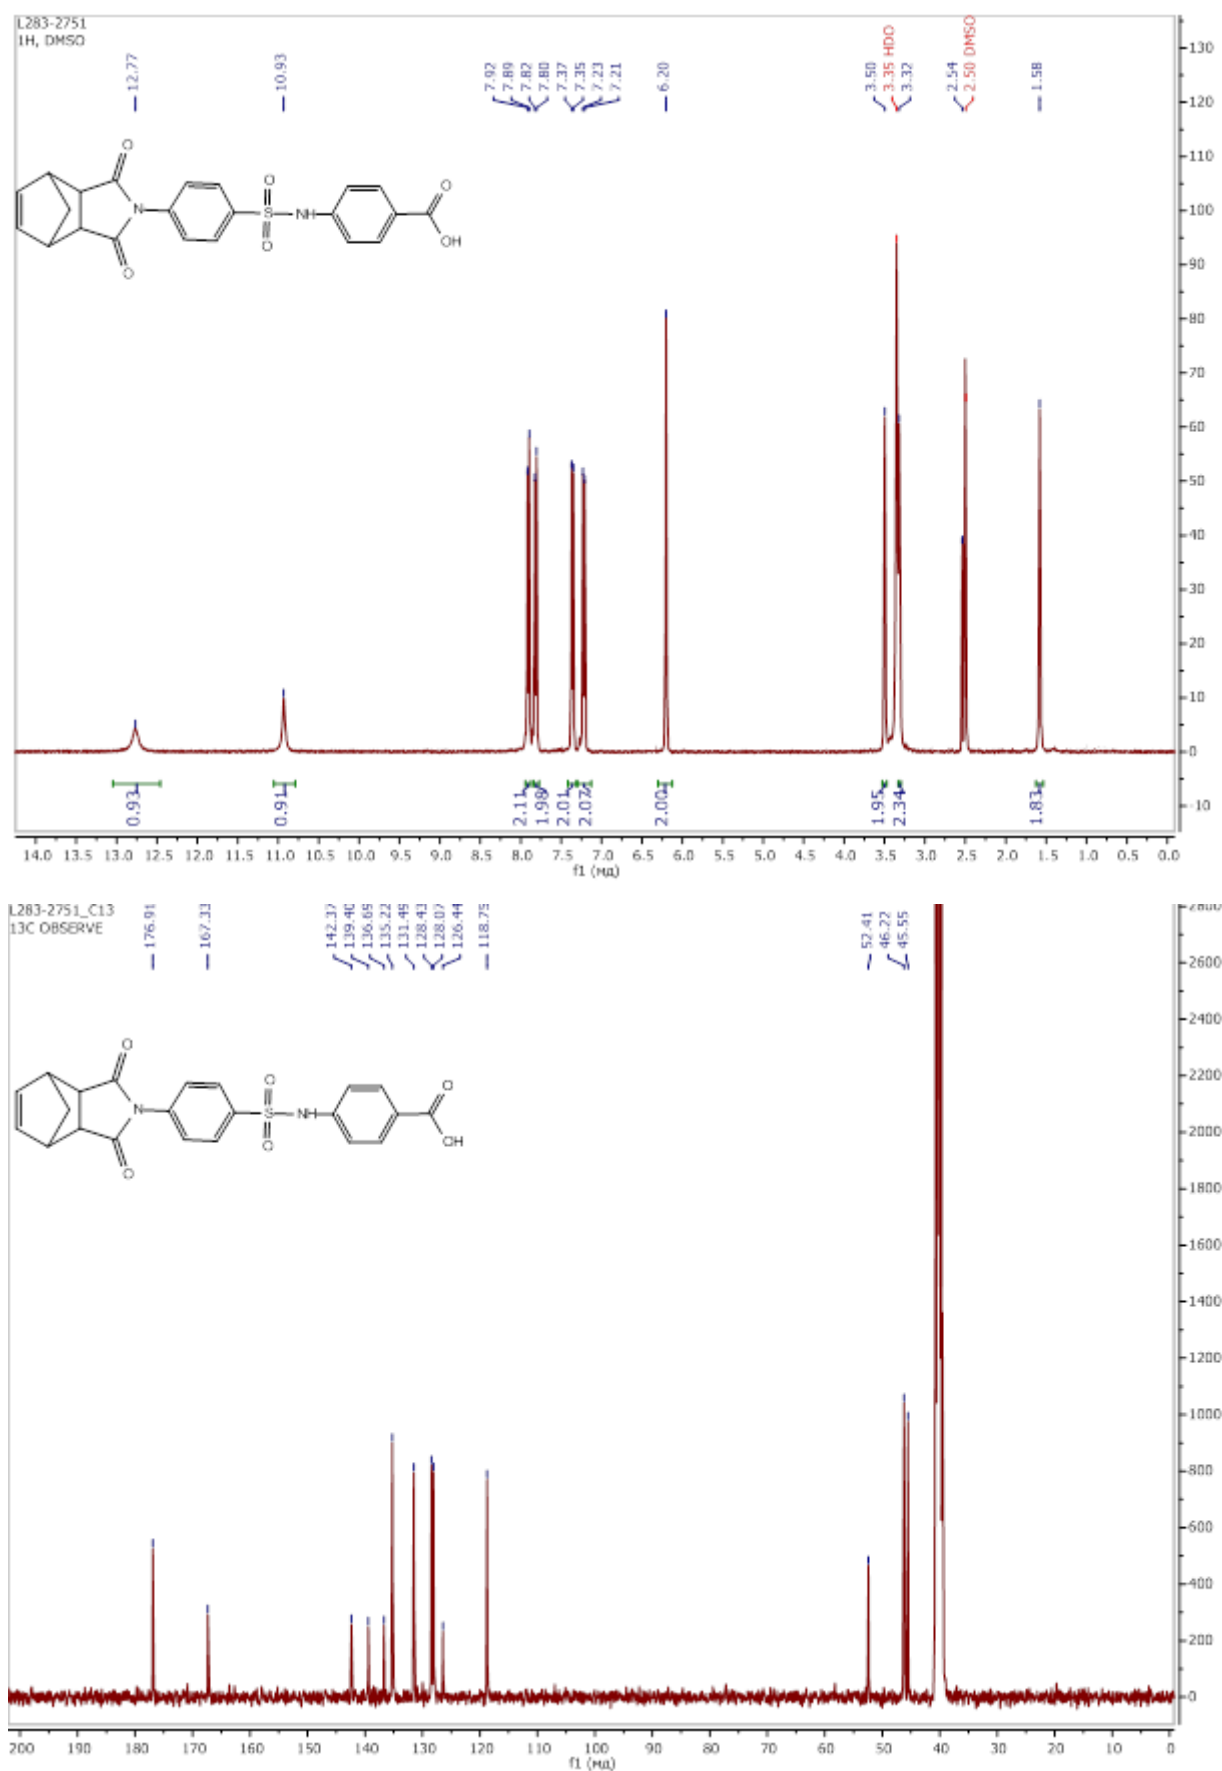



$^1\text{H}$  and  $^{13}\text{C}$  NMR spectra of 4-(4-(1,3-dioxohexahydro-1*H*-4,7-methanoisindol-2(3*H*)-yl)phenylsulfonamido)benzoic acid **7d**

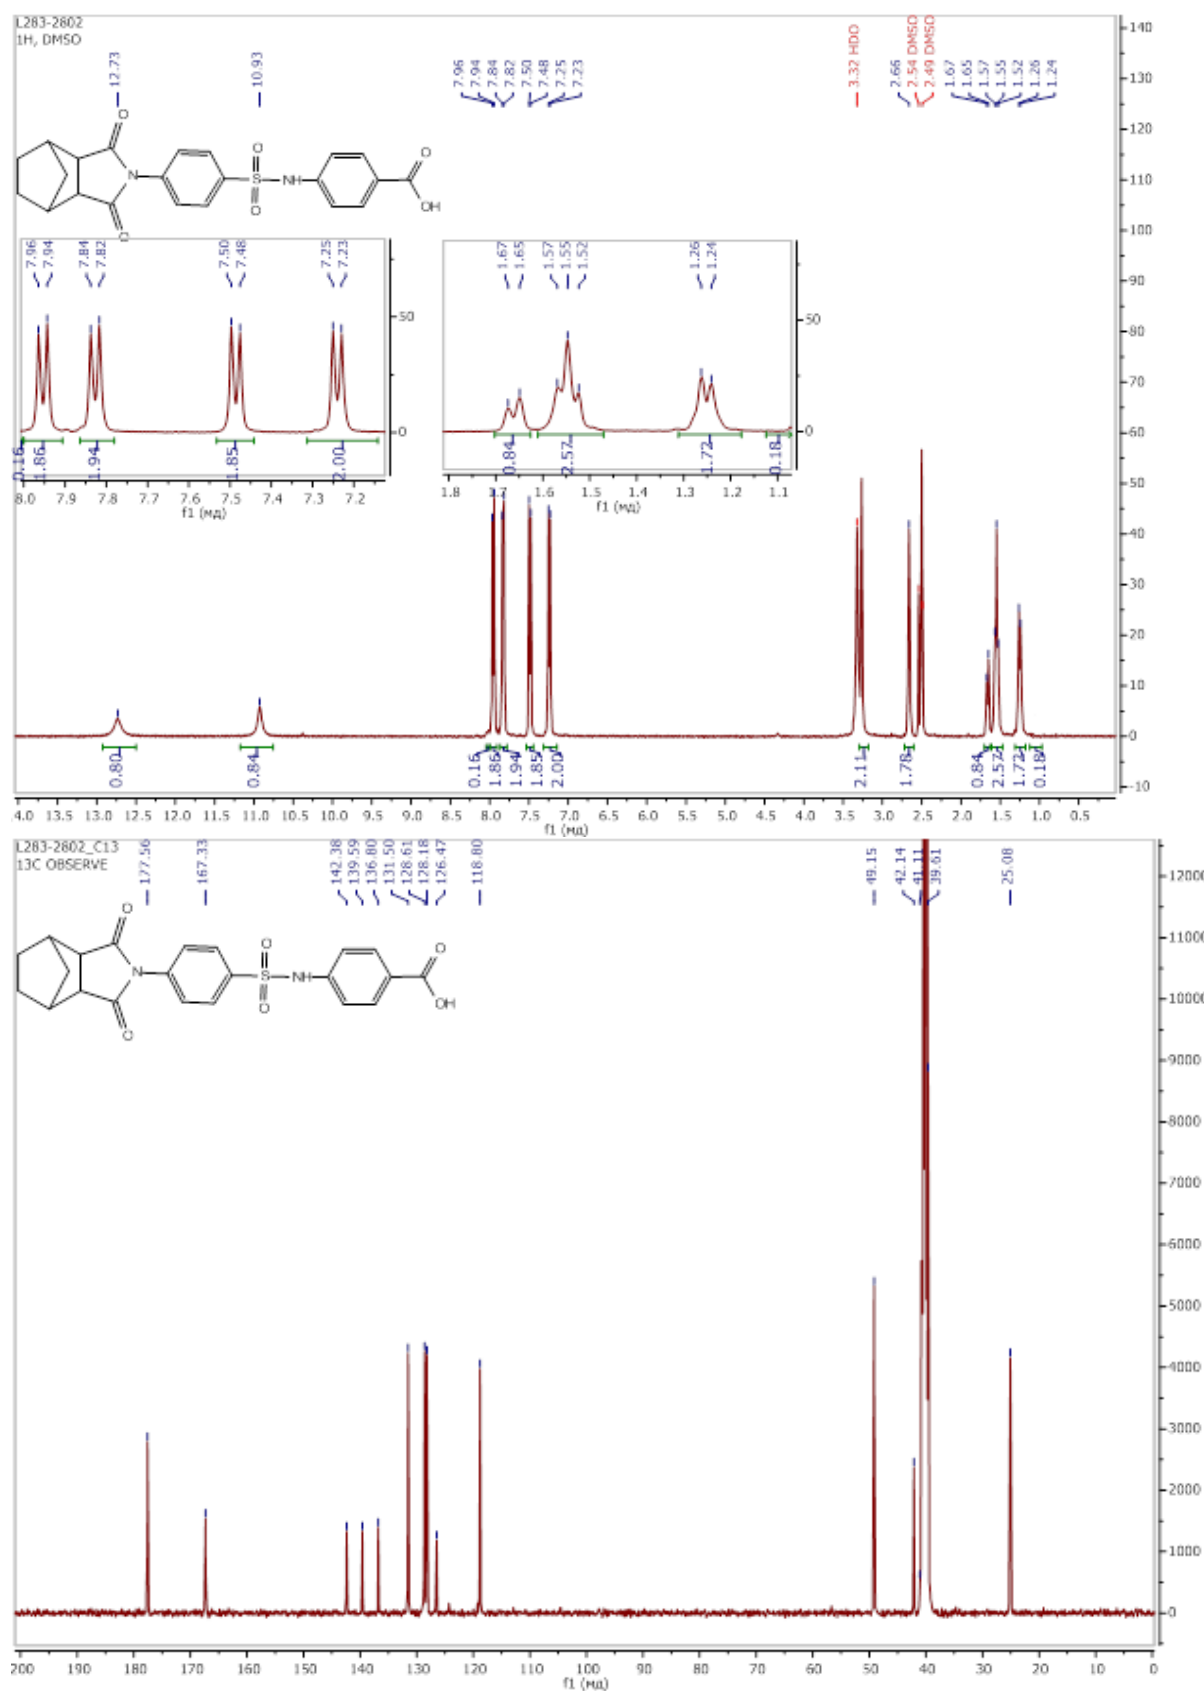

$^1\text{H}$  and  $^{13}\text{C}$  NMR spectra of 4-(4-(1,3-dioxo-1*H*-benzo[de]isoquinolin-2(3*H*)-yl)phenylsulfonamido)benzoic acid **7e**

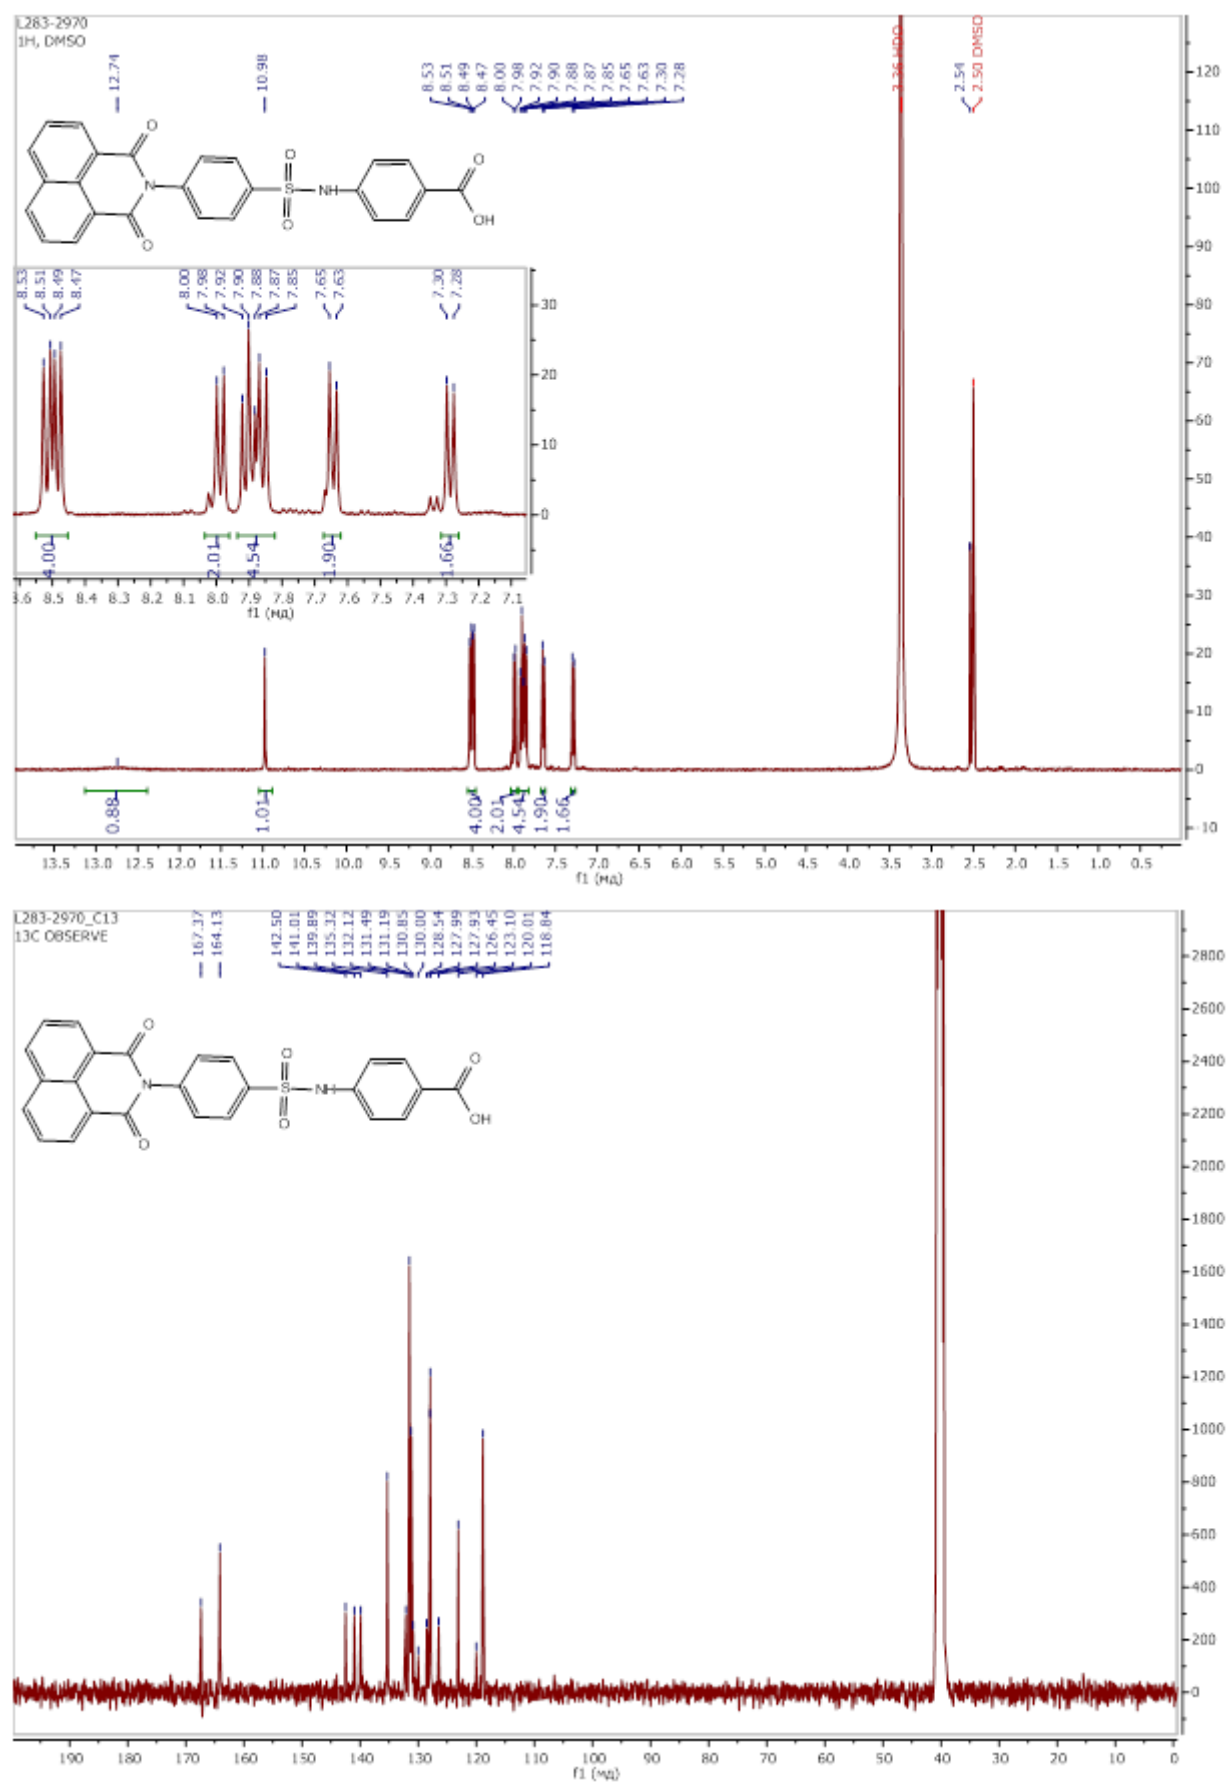

$^1\text{H}$  and  $^{13}\text{C}$  NMR spectra of 4-(4-(3-carboxypropanamido)phenylsulfonamido)benzoic acid **6a**

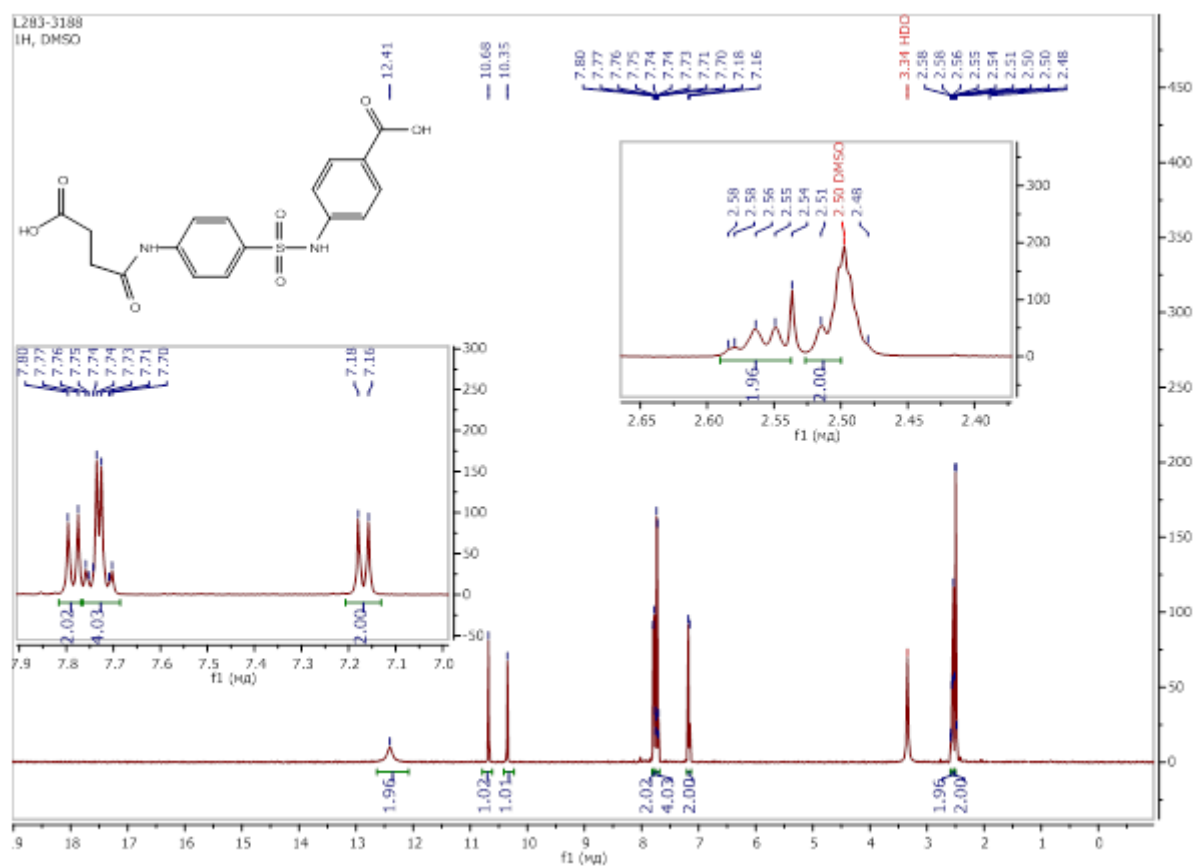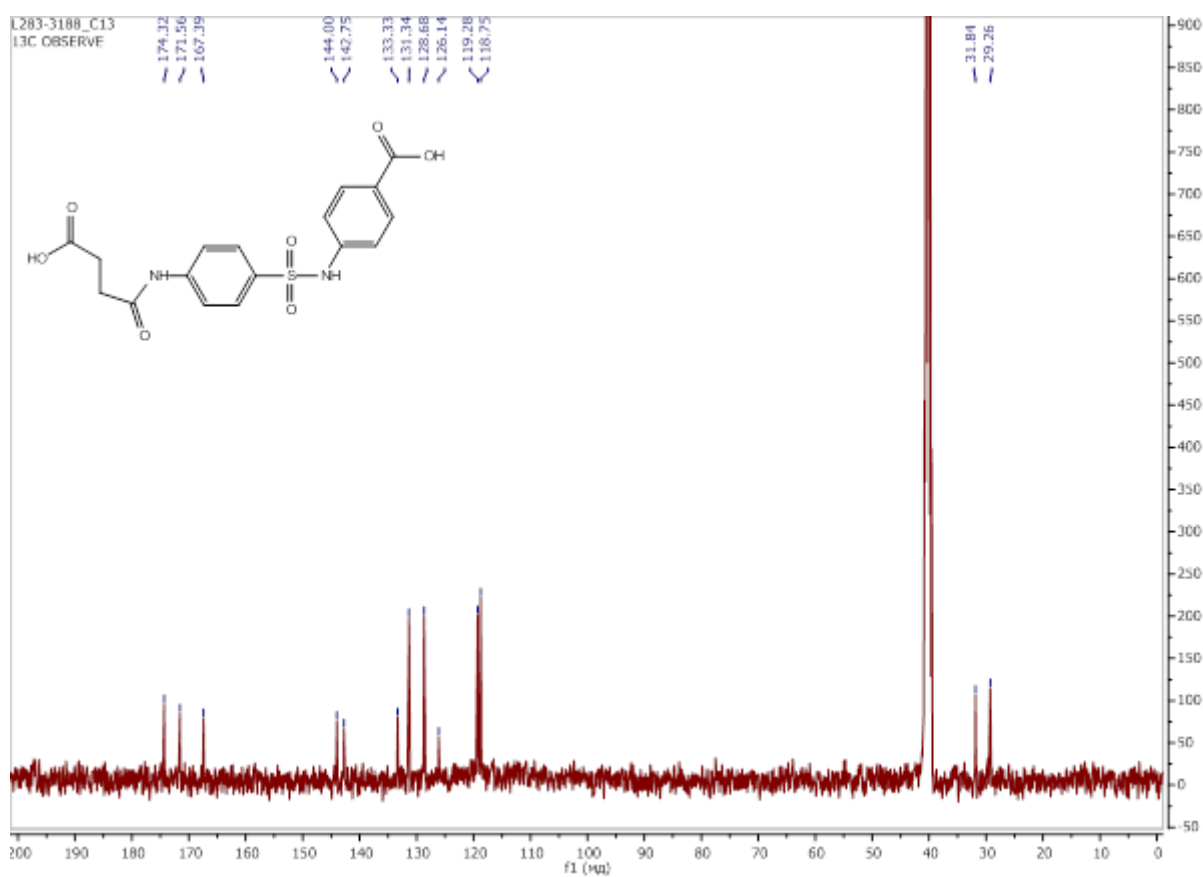

Supplement: s1 [file s1]
